# Supplementary material for: Whole Genome Sequencing Identifies a Missense Mutation in HES7 Associated with Short Tails in Asian Domestic Cats
Source: PubMed Central journal article supplement (PMC4997960; doi:10.1038/srep31583), 2016-08-25
Supplement: srep31583-s1.pdf [file srep31583-s1.pdf]

## **Whole Genome Sequencing Identifies a Missense Mutation in *HES7* Associated with Short Tails in Asian Domestic Cats**

Xiao Xu<sup>1</sup>, Xin Sun<sup>1</sup>, Xue-Song Hu<sup>1</sup>, Yan Zhuang<sup>1</sup>, Yue-Chen Liu<sup>1</sup>, Hao Meng<sup>1</sup>, Lin Miao<sup>1</sup>, Shu-Jin Luo<sup>1\*</sup>

<sup>1</sup>Peking-Tsinghua Center for Life Sciences, Laboratory of Genomic Diversity and Evolution, School of Life Sciences, Peking University, Beijing 100871, China

\* Correspondence should be addressed to S. J. Luo (luo.shujin@pku.edu.cn)

### **Supplementary Information:**

**Supplementary Table S1.** Radiography results of cats in the pedigree segregating at the kinked/short-tailed trait.

**Supplementary Table S2.** Statistics of whole genome resequencing data of cats in the pedigree (N=13).

**Supplementary Table S3.** Genetic variants from the skeleton-related genes within the 5.6 Mb of genomic region linked with kinked/short tails in Asian domestic cats.

**Supplementary Table S4.** Non-synonymous substitutions linked with kinked/short tails in the cat pedigree.

**Supplementary Table S5.** Breed cats sample information.

**Supplementary Table S6.** Primers for *T-box* and *HES7* exons.

**Table S1. Radiography results of cats in the pedigree segregating at the kinked/short-tailed trait.**

| <b>Cat ID</b> | <b>Tail phenotype</b> | <b>No. of caudal vertebrae</b> | <b>No. of caudal hemi-vertebrae</b> | <b>No. of caudal block vertebrae</b> | <b>Relationship</b> |
|---------------|-----------------------|--------------------------------|-------------------------------------|--------------------------------------|---------------------|
| FCAP072       | medium kink           | 14                             | 2                                   | 0                                    | dam                 |
| FCAP075       | normal                | 22                             | 0                                   | 0                                    | sire                |
| FCAP084       | medium kink           | 15                             | 3                                   | 1                                    | F1 litter 1         |
| FCAP085       | normal                | 22                             | 0                                   | 0                                    | F1 litter 1         |
| FCAP086       | normal                | 22                             | 0                                   | 0                                    | F1 litter 1         |
| FCAP087       | normal                | 22                             | 0                                   | 0                                    | F1 litter 1         |
| FCAP088       | medium kink           | 15                             | 1                                   | 1                                    | F1 litter 1         |
| FCAP089       | minor kink            | 21                             | 2                                   | 0                                    | F1 litter 1         |
| FCAP090       | medium kink           | NA                             | NA                                  | NA                                   | F1 litter 1         |
| FCAP110       | minor kink            | 21                             | 2                                   | 0                                    | F1 litter 2         |
| FCAP111       | medium kink           | 18                             | 1                                   | 1                                    | F1 litter 2         |
| FCAP112       | medium kink           | 17                             | 4                                   | 2                                    | F1 litter 2         |
| FCAP113       | minor kink            | 19                             | 1                                   | 1                                    | F1 litter 2         |

**Table S2. Statistics of whole genome resequencing data of cats in the pedigree (N=13).**

| <b>Cat ID</b>  | <b>Raw bases(Gb)</b> | <b>Unique mapped (Gb)</b> | <b>Unique mapped ratio</b> | <b>WGS Seq depth (unique mapped)</b> |
|----------------|----------------------|---------------------------|----------------------------|--------------------------------------|
| FCAP072        | 33.402               | 32.141                    | 96.22%                     | 13.287                               |
| FCAP075        | 29.835               | 28.426                    | 95.28%                     | 11.751                               |
| FCAP084        | 27.631               | 26.458                    | 95.75%                     | 10.938                               |
| FCAP085        | 25.948               | 24.704                    | 95.21%                     | 10.212                               |
| FCAP086        | 31.195               | 29.808                    | 95.55%                     | 12.322                               |
| FCAP087        | 25.933               | 24.890                    | 95.98%                     | 10.289                               |
| FCAP088        | 26.483               | 25.191                    | 95.12%                     | 10.414                               |
| FCAP089        | 25.132               | 24.068                    | 95.77%                     | 9.950                                |
| FCAP090        | 33.346               | 32.214                    | 96.61%                     | 13.317                               |
| FCAP0110       | 30.340               | 28.777                    | 94.85%                     | 11.896                               |
| FCAP0111       | 29.914               | 28.269                    | 94.50%                     | 11.686                               |
| FCAP0112       | 31.490               | 29.591                    | 93.97%                     | 12.233                               |
| FCAP0113       | 28.298               | 26.741                    | 94.50%                     | 11.055                               |
| <b>Average</b> | 29.150               | 27.791                    | 95.30%                     | 11.488                               |

**Table S3. Genetic variants from the skeleton-related genes within the 5.6 Mb of genomic region linked with kinked/short tails in Asian domestic cats.**

| <b>Can-<br/>didate<br/>Gene</b> | <b>No.<br/>SNPs<br/>in<br/>CDS</b> | <b>No.<br/>Synonymous<br/>Changes</b> | <b>No. Non-<br/>synonymous<br/>Changes</b> | <b>No. Linked<br/>Non-<br/>synonymous<br/>Changes</b> | <b>Skeleton phenotype caused by<br/>candidate gene mutation(s) in mice</b>                                                       |
|---------------------------------|------------------------------------|---------------------------------------|--------------------------------------------|-------------------------------------------------------|----------------------------------------------------------------------------------------------------------------------------------|
| <i>SPNS2</i>                    | 0                                  | 0                                     | 0                                          | 0                                                     | increase bone mineral density, increased sacral vertebrae number, decreased lumbar vertebrae number and abnormal rib morphology. |
| <i>MED31</i>                    | 0                                  | 0                                     | 0                                          | 0                                                     | spina bifida, small thoracic cage and small cranium.                                                                             |
| <i>DERL2</i>                    | 0                                  | 0                                     | 0                                          | 0                                                     | abnormal chondrocyte morphology, abnormal rib morphology, abnormal thoracic cage shape and sternebra fusion.                     |
| <i>PFN1</i>                     | 1                                  | 1                                     | 0                                          | 0                                                     | abnormal tail morphology, abnormal long bone epiphyseal plate proliferative zone, short femur and short humerus.                 |
| <i>TRP53</i>                    | 2                                  | 2                                     | 0                                          | 0                                                     | decreased bone mineral density, short humerus and short mandible.                                                                |
| <i>HES7</i>                     | 2                                  | 1                                     | 1                                          | 1                                                     | decrease rib number, kinked tail and vertebral fusion.                                                                           |
| <i>PER1</i>                     | 4                                  | 3                                     | 1                                          | 0                                                     | increased bone mass and increased osteoblast cell number.                                                                        |
| <i>TMEM107</i>                  | 0                                  | 0                                     | 0                                          | 0                                                     | abnormal basioccipital bone morphology, abnormal exoccipital bone morphology and absent presphenoid bone.                        |
| <i>PFAS</i>                     | 24                                 | 19                                    | 5                                          | 0                                                     | abnormal cranium morphology and abnormal synchondrosis                                                                           |
| <i>MYH10</i>                    | 12                                 | 12                                    | 0                                          | 0                                                     | abnormal cranium morphology and micrognathia.                                                                                    |
| <i>MYH1</i>                     | 17                                 | 17                                    | 0                                          | 0                                                     | kyphosis.                                                                                                                        |

**Table S4. Non-synonymous substitutions linked with kinked/short tails in the cat pedigree.**

| <b>SNPs position</b> | <b>gene</b> | <b>base change</b> | <b>AA change</b> | <b>evolutionary constraint</b> |
|----------------------|-------------|--------------------|------------------|--------------------------------|
| ChrE1: 728296        | SLC13A5     | c.979C>G           | p.L327V          | unconserved                    |
| ChrE1: 781350        | KIAA0753    | c.1081G>A          | p.V361I          | unconserved                    |
| ChrE1: 892541        | FAM64A      | c.482G>A           | p.R161H          | unconserved                    |
| ChrE1: 2297535       | SPEM1       | c.245T>C           | p.L82P           | unconserved                    |
| ChrE1: 2324561       | CHRNA1      | c.1222C>T          | p.P408S          | unconserved                    |
| ChrE1: 2329714       | ZBTB4       | c.2969G>C          | p.G990A          | conserved                      |
| ChrE1: 2439792       | SOX15       | c.463A>G           | p.T155A          | unconserved                    |
| ChrE1: 2863523       | HES7        | c.5T>C             | p.V2A            | conserved                      |
| ChrE1: 3408840       | MFSD6L      | c.566G>A           | p.R189H          | unconserved                    |
| ChrE1: 3427381       | PIK3R6      | c.1819G>A          | p.V607I          | unconserved                    |
| ChrE1: 3436815       | PIK3R6      | c.882A>C           | p.E294D          | unconserved                    |
| ChrE1: 4116504       | USP43       | c.2299G>A          | p.G767S          | unconserved                    |
| ChrE1: 4131116       | USP43       | c.2792G>A          | p.R931K          | unconserved                    |

**Table S5. Breed cats sample information**

| <b>Breed</b>         | <b>Sample No.</b> | <b>Tail phenotype</b> |
|----------------------|-------------------|-----------------------|
| Japanese bobtail     | 12                | kinked                |
| Abyssinian           | 4                 | normal                |
| American Shorthair   | 4                 | normal                |
| Bengal               | 6                 | normal                |
| Birman               | 5                 | normal                |
| Burmese              | 2                 | normal                |
| Cornish Rex          | 2                 | normal                |
| Devon Rex            | 12                | normal                |
| Havana Brown         | 8                 | normal                |
| Egyptian Mau         | 9                 | normal                |
| Maine Coon           | 9                 | normal                |
| Ocicat               | 1                 | normal                |
| Oriental Shorthair   | 14                | normal                |
| Persian              | 11                | normal                |
| Ragdoll              | 8                 | normal                |
| Scottish Fold        | 4                 | normal                |
| Siamese              | 3                 | normal                |
| Somali               | 1                 | normal                |
| Sphynx               | 1                 | normal                |
| Selkirk Rex          | 1                 | normal                |
| Norwegian Forest Cat | 2                 | normal                |

**Table S6. Primers for *T-box* and *HES7* exons.**

| <b>Amplicon</b> | <b>Size (bp)</b> | <b>Forward primers (5' to 3')</b> | <b>Reverse primer (5' to 3')</b> |
|-----------------|------------------|-----------------------------------|----------------------------------|
| T-box-ex1       | 270              | GGGGAAGAGCCTGCAGTA                | GGAAGGGAGCAAGAACACC              |
| T-box-ex2       | 388              | CTTCTCTCTGCCCCACAT                | CGGGCTCCATCACACCTAC              |
| T-box-ex3       | 225              | AGGTCTGGTTTCTCTGCTTCC             | TCTCTGCATGCTTTGTGAGC             |
| T-box_ex4-5     | 294              | AACCGTGAATTCTTGTTTTTCA            | CCGAGACAGAGTGCAACAAA             |
| T-box-ex6       | 241              | AGGCAAATGGCAGTTACTCA              | CCGGTCTACTGCGACTTAG              |
| T-box-ex7       | 226              | TGCCTTTGATGACCAATGAA              | GACGCTCTGCATCATGTCC              |
| T-box-ex8       | 333              | CCTGGTTTCTGCCTGACTGT              | TTTACGACACAGGCCTCGAT             |
|                 |                  |                                   |                                  |
| HES7-ex1        | 222              | CAGGAGCTGCGGGATATAAG              | ACACCTCTCCCCTTTCCAAC             |
| HES7-ex2        | 270              | GCCAGCTCTCCCTTTCCT                | CTGGGATGGGACTCCAAAG              |
| HES7-ex3        | 247              | CCCACCCCTTTCTGTCTTTG              | AGCCTACCGCTCCCAAG                |
| HES7-ex4        | 500              | GGGCTTCGGTTATCTCTGC               | GCCCCGTCTTGTCTGTGC               |
| HES7-ex5        | 345              | GACTGGAGCCGGTAGATCC               | GGGCTGGAGTCTCTACCTCA             |
